# Supplementary material
Source: Elsevier journal article supplement (https://www.sciencedirect.com/science/article/pii/S1579212921003529)
Supplement: mmc2 [file S1579212921003529:mmc2.pdf]

**A**

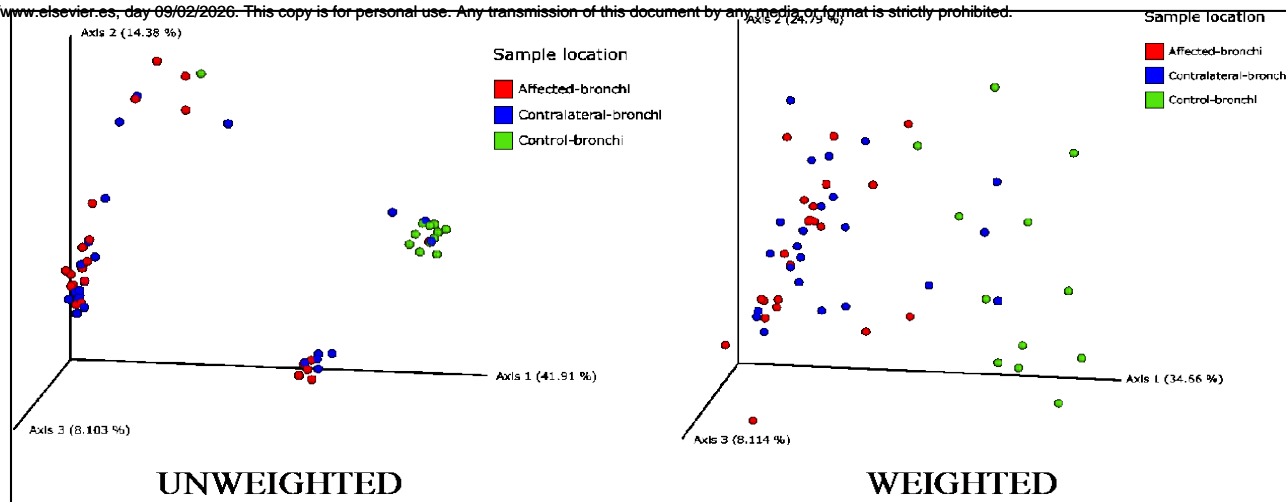

**B**

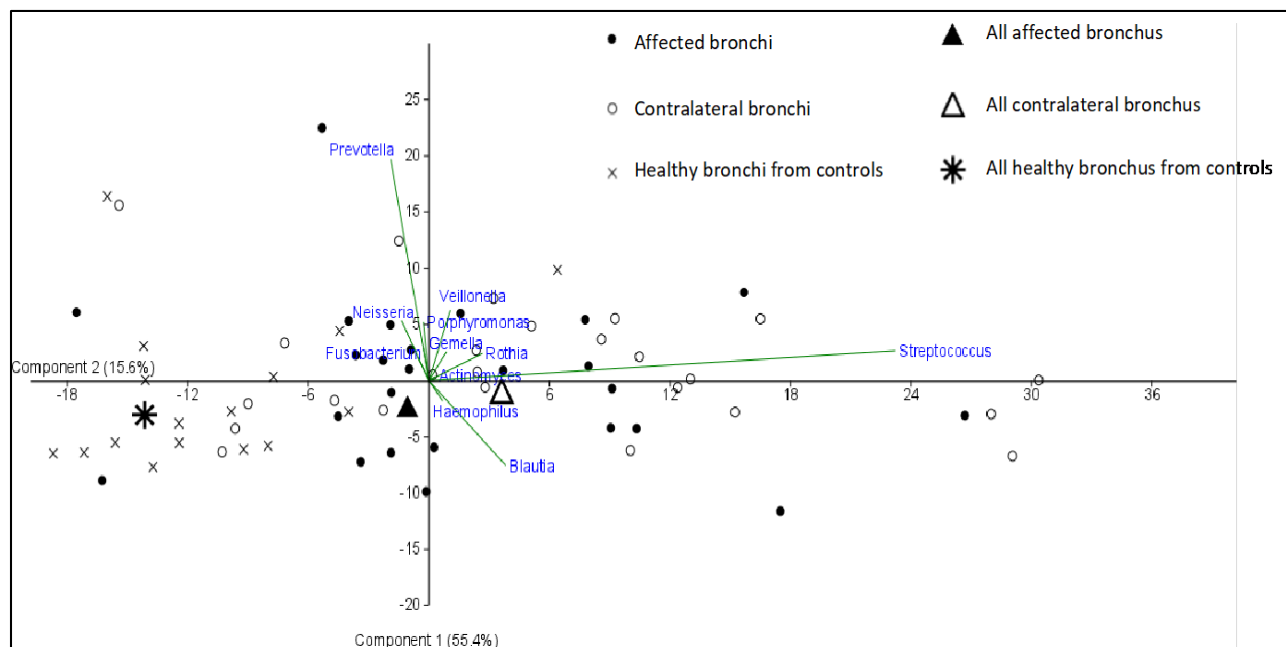

**Supl. Fig. 1. Representation and comparison of the microbiota from cancer affected, contralateral and control bronchi. A:** UniFrac beta diversity analysis of bronchi samples. Unweighted UniFrac reports differences in the presence or absences of ASVs, while weighted UniFrac also reports differences in the abundance of ASVs. **B:** PCA of most abundant genera that constituted 90% of the bronchial microbiota of both patients and controls.

**A**

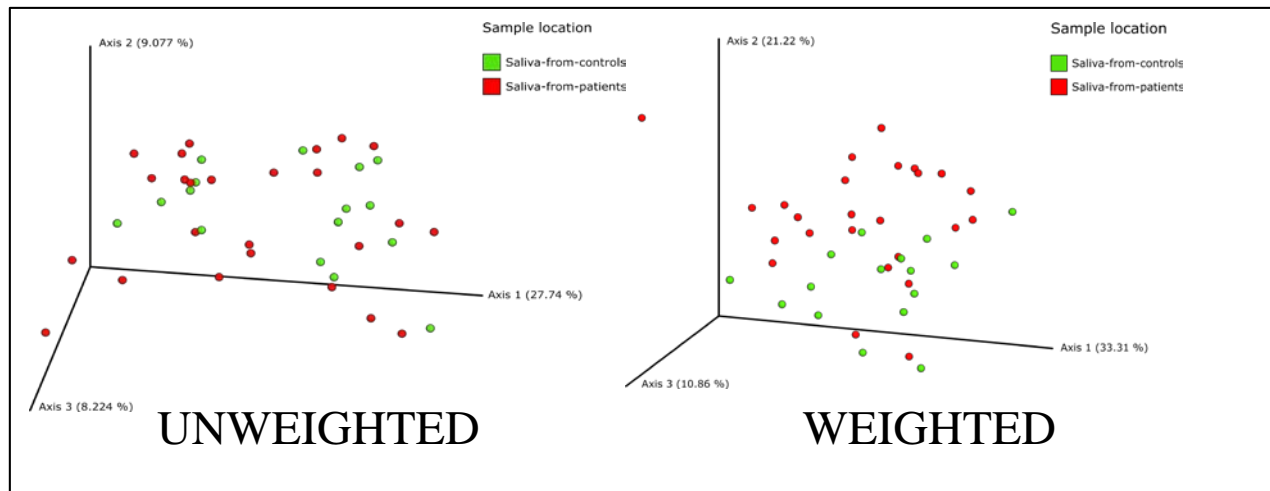

**B**

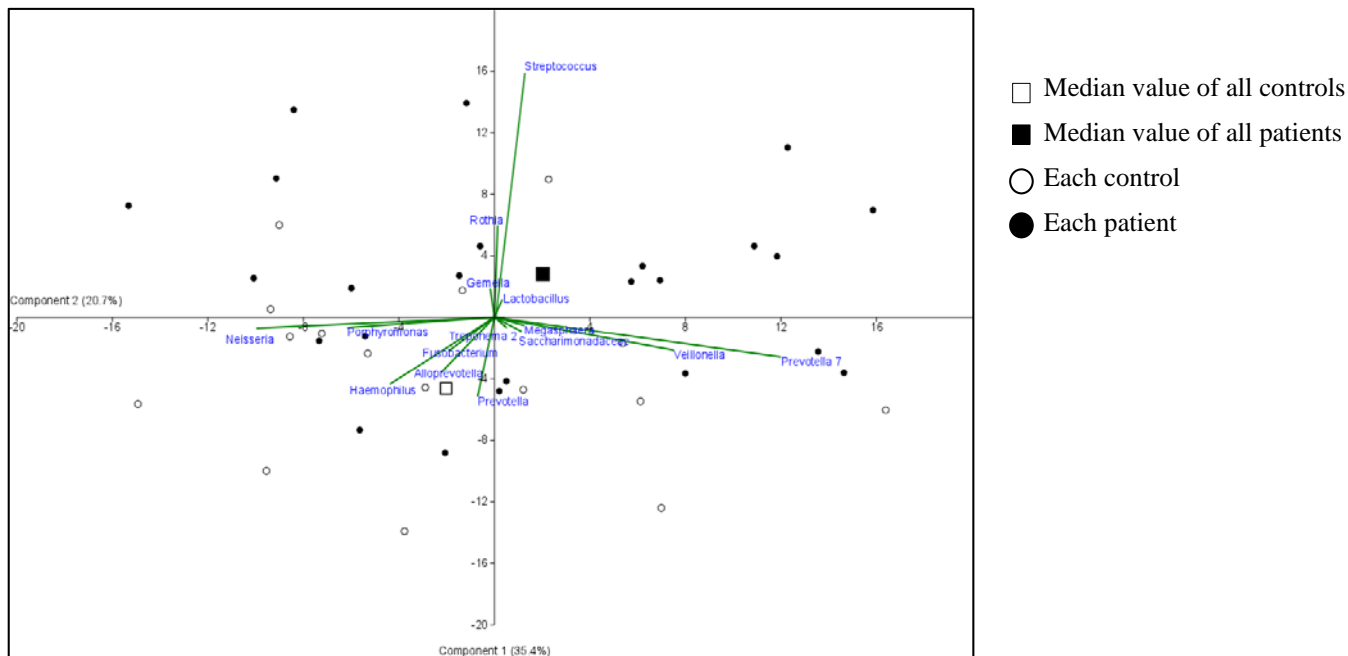

**Supl. Fig. 2. A:** UniFrac beta diversity analysis of salivary samples. Unweighted UniFrac reports differences in the presence or absences of ASVs, while weighted UniFrac also reports differences in the abundance of ASVs. **B:** Principal Component Analysis (PCA) of the most abundant genera that constitute 90% of the total salivary microbiota.

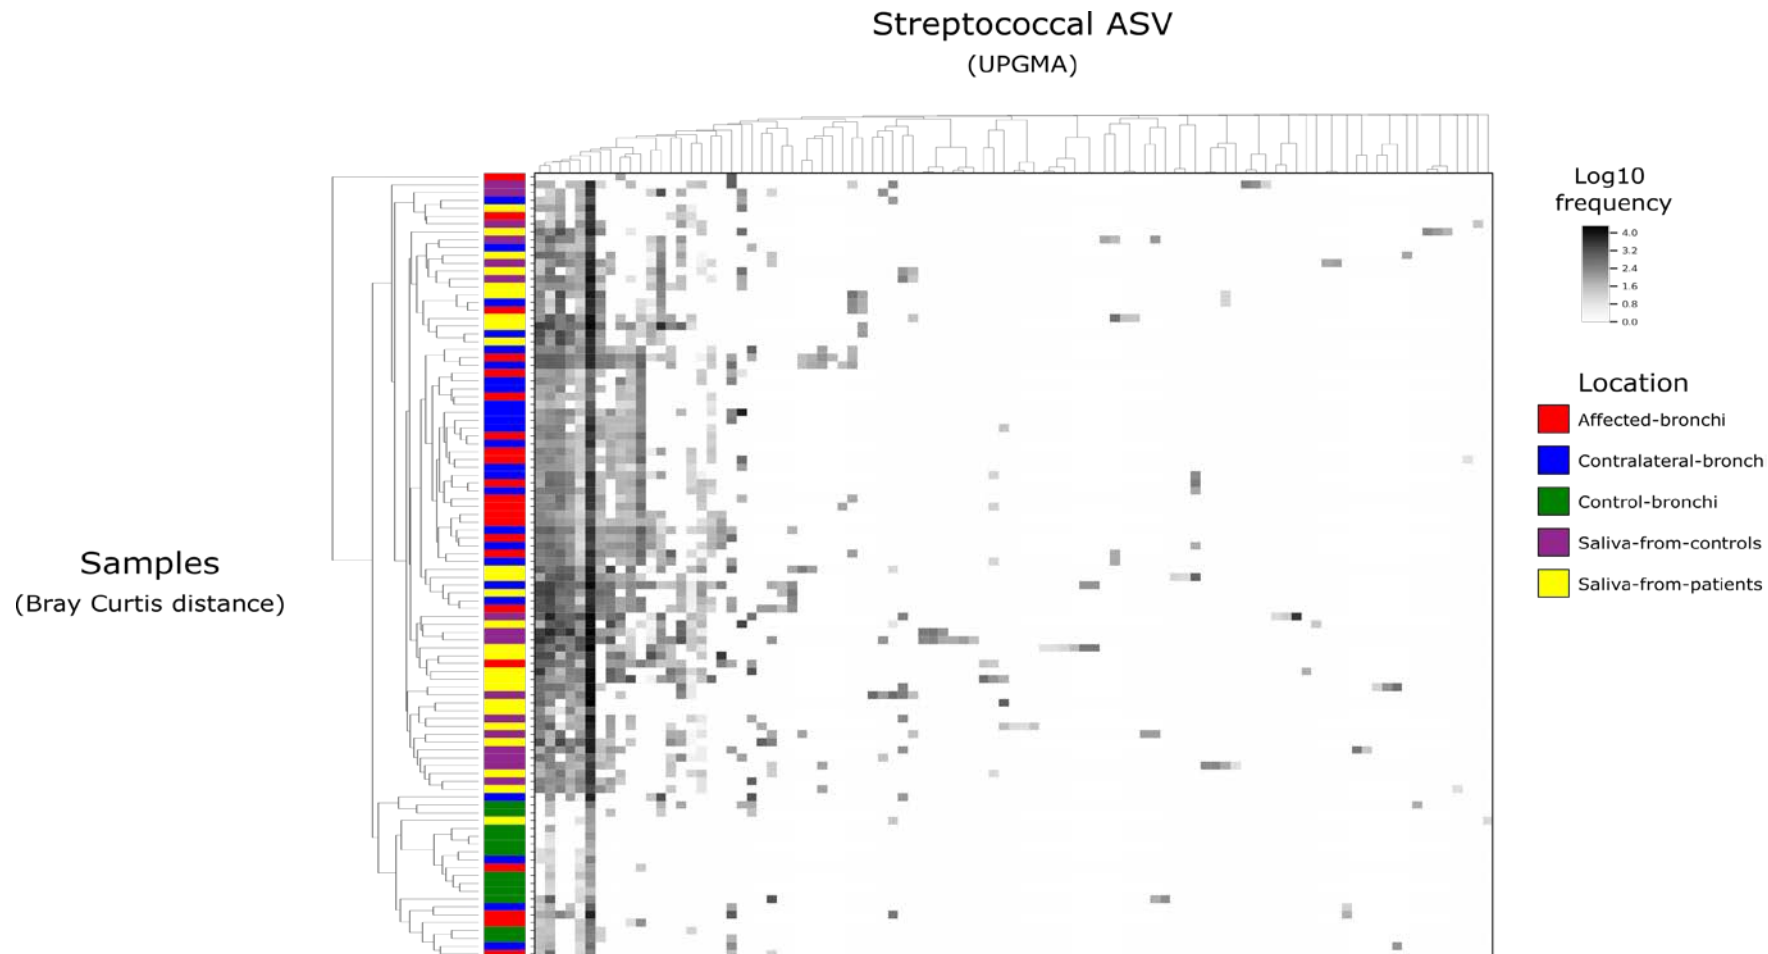

**Supl. Fig. 3.** Heatmap correlating the abundance of Streptococcal ASVs (horizontal axis) with the samples (vertical axis). A total of 95 ASVs were considered.

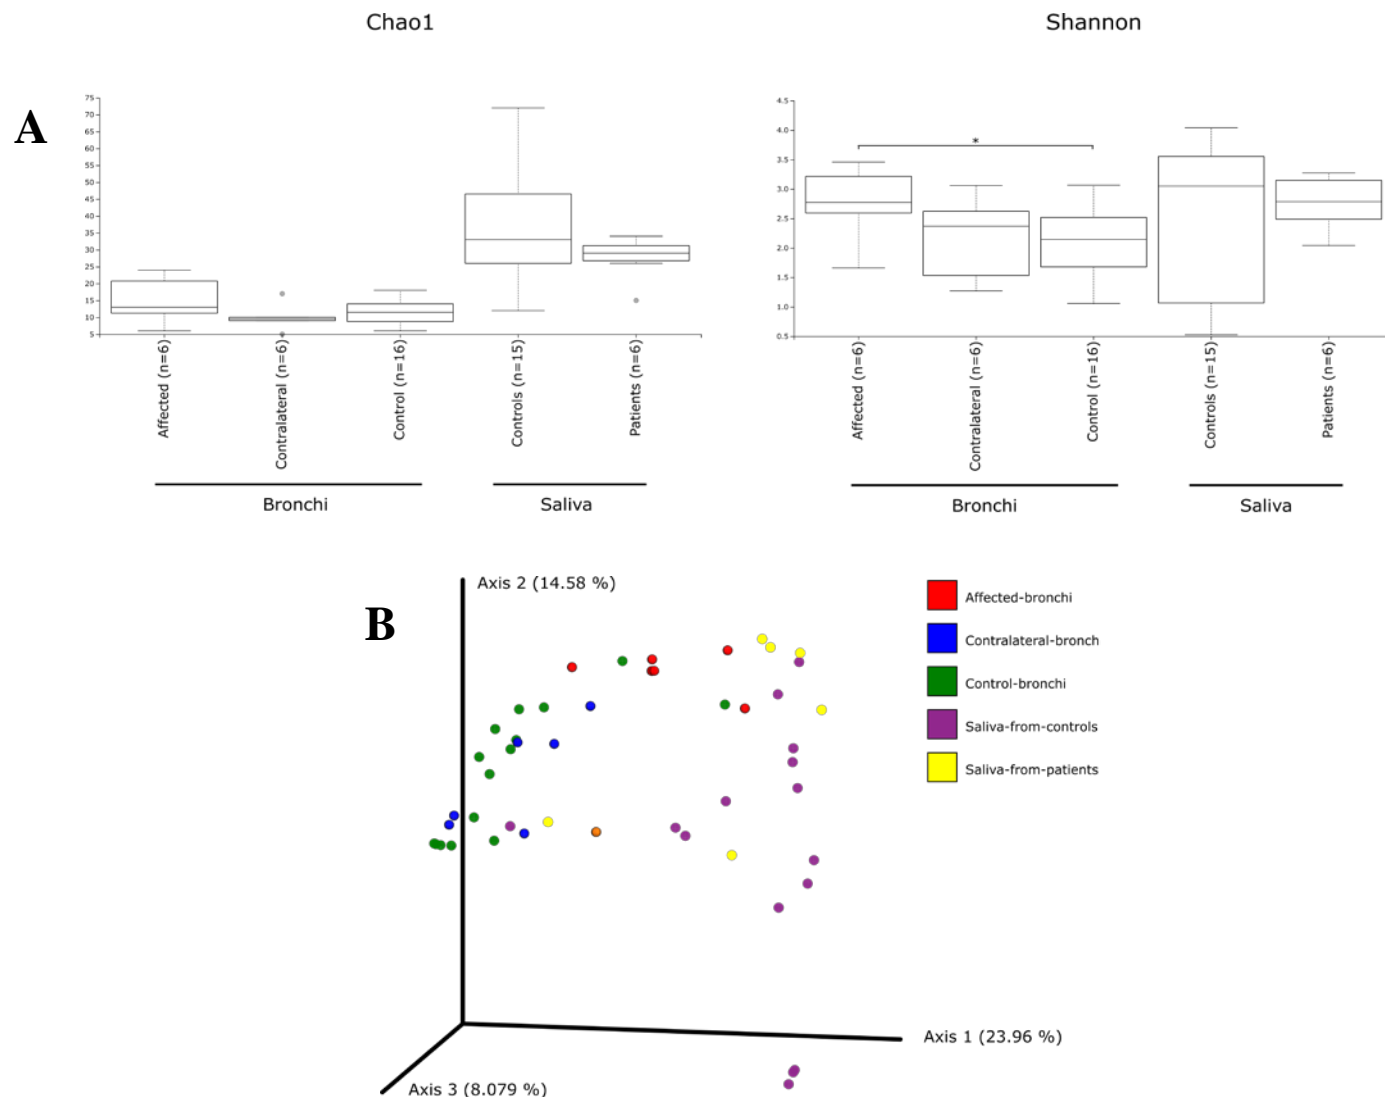

**Supl. Fig 4. A:** Alpha diversity of the mycobiome detected in the different samples, significant differences ( $p < 0.05$ ) between patients and controls are highlighted by asterisks. **B:** PCoA based on Bray Curtis distances, showing the distribution of samples according to their mycobiome.
